# Cranial Endocast of the Lambeosaurine Hadrosaurid *Amurosaurus riabinini* from the Amur Region, Russia

Pascaline Lauters<sup>1,2\*</sup>, Martine Vercauteren<sup>2</sup>, Yuri L. Bolotsky<sup>3</sup>, Pascal Godefroit<sup>1</sup>

**1** Department of Palaeontology, Royal Belgian Institute of Natural Sciences, Bruxelles, Belgium, **2** Service d'Anthropologie et Génétique Humaine, Université Libre de Bruxelles, Bruxelles, Belgium, **3** Geological and Nature Exploration Institute, Far Eastern Branch of the Russian Academy of Sciences, Blagoveschensk, Russia

## Abstract

Information on the structure of the brain of the lambeosaurine hadrosaurid dinosaur *Amurosaurus riabinini*, from the Late Maastrichtian of Blagoveschensk, Far Eastern Russia, is presented based on endocranial casts. The endocasts are compared with physical and digital endocasts of other dinosaurs. The olfactory tract was large. The cerebral hemispheres are enlarged and round, illustrating the important development of this part of the brain in hadrosaurids. The pituitary body is enlarged as well, perhaps prefiguring the large size attained by hadrosaurids. The EQ of *Amurosaurus* was similar to that of the lambeosaurine dinosaur *Hypacrosaurus altispinus* and was relatively larger than in most extant non-avian reptiles, including sauropod and ceratopsian dinosaurs. However, it was apparently relatively smaller than those of most theropod dinosaurs. The relatively large size of the cerebrum is consistent with the range and complexity of social behaviors inferred for lambeosaurine dinosaurs.

**Citation:** Lauters P, Vercauteren M, Bolotsky YL, Godefroit P (2013) Cranial Endocast of the Lambeosaurine Hadrosaurid *Amurosaurus riabinini* from the Amur Region, Russia. PLoS ONE 8(11): e78899. doi:10.1371/journal.pone.0078899

**Editor:** Richard J. Butler, University of Birmingham, United Kingdom

**Received:** April 9, 2013; **Accepted:** September 16, 2013; **Published:** November 13, 2013

**Copyright:** © 2013 Lauters et al. This is an open-access article distributed under the terms of the Creative Commons Attribution License, which permits unrestricted use, distribution, and reproduction in any medium, provided the original author and source are credited.

**Funding:** This study was realized through the execution of S&T bilateral cooperation agreements on behalf of the Belgian State, Federal Scientific Policy. It constitutes part of a Ph.D. thesis by PL at the Université Libre de Bruxelles, thanks to a grant from the Fonds pour la formation à la Recherche dans l'Industrie et l'Agriculture. The funders had no role in study design, data collection and analysis, decision to publish, or preparation of the manuscript.

**Competing Interests:** The authors have declared that no competing interests exist.

\* E-mail: plauters@ulb.ac.be

## Introduction

Since 1902, and the first discovery of dinosaur fossils in the Amur region (Far Eastern Russia), thousands of bones were collected from this area. Most of them belong to hadrosaurid taxa. *Amurosaurus riabinini* Bolotsky and Kurzanov, 1991 [1,2] and *Kerberosaurus manakini* Bolotsky and Godefroit, 2004 [3] were found in Blagoveschensk, whereas *Olorotitan arharensis* Godefroit, Bolotsky, and Alifanov, 2003 [4] was found in Kundur, both localities being in the Amur Region of Far Eastern Russia. *Charonosaurus jiyinensis* Godefroit, Zan, and Jin, 2000 [5,6], *Sahaliyana elunchunorum* Godefroit, Shulin, Tinghai, and Lauters, 2008 [7] and *Wulaga-saurus dongi* Godefroit, Shulin, Tinghai, and Lauters, 2008 [7] were found in the adjacent region of China (Heilongjiang Province).

Among this material, some braincases of *Amurosaurus* were found. The brain is a structure very sensitive to rapid decay after the death of the animal and is thus generally lost before any fossilization. Natural endocasts are rare [8,9], and until recently the endocranial cavity of fossil taxa was generally inaccessible for study without destructive preparation ([10]: p. 38). Recently, high-resolution x-ray CT scan was often used to access the endocranial cavity of fossil specimens. However, in some cases this method is impractical; the specimen may be too small or too large to be CT scanned, or researchers cannot access easily the machine or the cost to use it is too high. It is also possible in some cases to make an endocast without damaging the specimen, using materials such as silicone or latex rubber [11,12].

The purpose of this paper is to describe the endocast and the cranial nerves of *Amurosaurus riabinini*, and is based on the assumption that the casts provide a good insight into the general

morphology of the brain [13,14,15,16,17]. Subsequently, we compare the encephalization quotient and the cerebral volume of *Amurosaurus* to those of other dinosaurs. Independently published data about the endocranial anatomy of this species based upon the same material [18] is also discussed, and interpretations contrasted with those presented here. Finally, hypotheses about the behavior of lambeosaurine hadrosaurid dinosaurs are proposed.

## Materials and Methods

### Institutional Abbreviations

AEHM, Amur Natural History Museum, of the Amur Complex Integrated Research Institute of the Far Eastern Branch of the Russian Academy of Sciences, Blagoveschensk, Russia (Amur KNII FEB RAS); IRSNB, Institut Royal des Sciences Naturelles de Belgique, Brussels, Belgium.

### Specimens

IRSNB R 279 (endocast of AEHM 1/232), IRSNB R 280 (endocast of AEHM 1/233), and IRSNB R 281 (endocast of AEHM 1/90), and AEHM 1/240.

### Ethics Statement

This study is based on study of material held in the collections of the Amur Natural History Museum. No permits were required for the described study, which complied with all relevant regulations.

## Description

The casts were obtained on the basis of a complete and undistorted braincase (AEHM 1/232) and partial braincases (AEHM 1/90 and AEHM 1/233) of *Amurosaurus riabinini*. AEHM 1/232 and AEHM 1/90 were described in the revision of the genus by Godefroit et al. [2]. The specimen AEHM 1/233 shows the prominent median process between the basiptyergoid processes typical of *Amurosaurus riabinini* and is referred to this taxon. The presence of valleculeae was observed on an additional specimen (AEHM 1/240). The complete braincase (AEHM 1/232) was used to make the cast IRSNB R 279 and the description of the global features of the endocranial cavity. More details about the cranial nerves could be observed on the casts of two partial braincases: IRSNB R 280 and IRSNB R 281. These specimens were collected during the 1980s field campaign from the Upper Cretaceous Udurchukan Formation (Maastrichtian, Late Cretaceous) by Yuri L. Bolotsky. The braincases are fused and from large, presumably adult, individuals. For a complete description of the braincase of this species, see Godefroit et al. [2]. For general measurements of the braincase AEHM 1/232, see Table 1. The specimens used here were also among those used by Saveliev et al. [18] in their independent study of the endocranial anatomy of this species. However, this study is based on a different set of casts and new interpretations about the endocranial anatomy and possible behavior of *Amurosaurus* are presented.

The specimens were molded using the following technique. The complete braincase was prepared by covering the smallest foramina and fractures with modeling clay, the foramen magnum was left free. A thin layer of Vaseline was sprayed into the endocranial cavity to prevent excessive adherence of the silicone. Silicone was mixed with a catalyst and poured into the endocranial cavity to create the first endocranial silicone layer. This first layer was allowed to dry for at least 24 hours. Once dry, additional silicone was poured at intervals to create a multi-layered cast. This technique allows the strengthening of the endocranial cast and prevents its tearing. When the last layer of silicone was completely dry, the endocranial cast was pulled out and the braincase was subsequently cleaned.

The volume of the endocast was measured by placing it, beforehand filled with tiny glass marbles, in water and measuring water displacement.

## Encephalization Quotient

The encephalization quotient (EQ) is an estimation of the relative size of the brain and represents the actual brain size of an individual divided by the expected brain size for its particular body size calculated using an allometric relationship derived from a large extant sample [19,20]. According to Jerison [19] and Hopson [13], there is a negative allometry in vertebrates between brain size and body size. Based upon EQ, Jerison [19] noted that living vertebrates cluster into two groups: endotherms and

ectotherms. Hopson [13] concluded that the EQs of dinosaurs are usually placed between those of modern ectotherms and endotherms. Hurlburt [14] adapted Jerison's "lower" vertebrate equation for non-avian-reptiles and defined a Reptile Encephalization Quotient (REQ).  $REQ = M_{Br} / (0.0155 * M_{Bd}^{0.553})$ , where  $M_{Br}$  is the mass of the brain (in grams), and  $M_{Bd}$  is the mass of the body (in grams). The mass of the brain is obtained by multiplying the volume of the brain by 1.036 g/ml [21].

In extinct taxa, both the brain and body masses must be estimated, leading to many uncertainties in the calculation of the REQ. Given that no complete skeleton of *Amurosaurus* has been discovered, it is difficult to estimate the mass of an adult individual, because no braincase is directly associated to appendicular bones. Because AEHM 1/232 clearly belongs to a large adult specimen, we selected the longest femur and humerus and measured their circumference in order to estimate the mass of a large adult *Amurosaurus*. The specimens were selected according to their lambeosaurine characteristics [2] and for their size indicating that they belonged to an adult individual [22]. In addition, the ratio of humerus/femur circumferences of the selected bones matches the ratio obtained for articulated adult hadrosaurid skeletons [23,24]. REQ calculations for dinosaurs usually estimated the volume of the brain under the assumption that the brain occupied 50% of the endocranial volume [14,20,25]. According to Evans [17] and Evans et al. [26], the extensive valleculeae in hadrosaurids imply that the brain occupied a larger portion of the endocranial cavity than in other ornithischians and they calculated the REQ based on a brain size estimate of 60% endocast volume. Because valleculeae can also be observed in *Amurosaurus* specimens, we here follow the assumption of Evans et al. [26].

## Results

### Systematic Paleontology

- DINOSAURIA Owen, 1842 [27]
- ORNITHISCHIA Seeley, 1887 [28]
- ORNITHOPODA Marsh, 1881 [29]
- ANKYLOPOLLEXIA Sereno, 1986 [30]
- HADROSAURIFORMES Sereno, 1986 [30]
- HADROSAUROIDEA Cope, 1869 [31]
- HADROSAURIDAE Cope, 1869 [31]
- LAMBEOSAURINAE Parks, 1923 [32]
- Amurosaurus* Bolotsky and Kurzanov, 1991 [1]
- Amurosaurus riabinini* Bolotsky and Kurzanov, 1991 [1]

## Description

The general aspect of the endocast is described from the specimen IRSNB R 279 (Fig. 1). This specimen is a complete and fused braincase from a large and presumably fully grown individual [2]. The cast measures 154 mm from the base of olfactory tract to the caudal branch of the hypoglossal nerve, and has a total volume of 290 cm<sup>3</sup>. A larger volume for the same endocast was given in Saveliev et al. [18] (370–400 cm<sup>3</sup>), although those authors did not explain how this number was obtained. The maximal height of the endocast is 65 mm, excluding the pituitary body. The olfactory tract is placed rostroventral to the hemispheres. It was not possible to obtain a cast of the olfactory bulbs, although it is possible to observe that the olfactory tract is very broad, measuring 281.5 mm wide. On the edge of the tract, the bases of presphenoid sulci (Fig. 1A) can be discerned, as observed by Evans [33] on other hadrosaurid specimens.

The cerebral hemispheres are rounded and wide (69 mm above the optic nerves), representing the broadest part of the brain. They are slightly compressed dorsoventrally. The large size of this region

**Table 1.** General measurements of the braincase AEHM 1/232.

|                         |           |
|-------------------------|-----------|
| Frontal length          | 93        |
| Frontal width           | 63 (left) |
| Parietal length         | 99        |
| Occipital condyle width | 59        |

Measurements given in mm.

doi:10.1371/journal.pone.0078899.t001

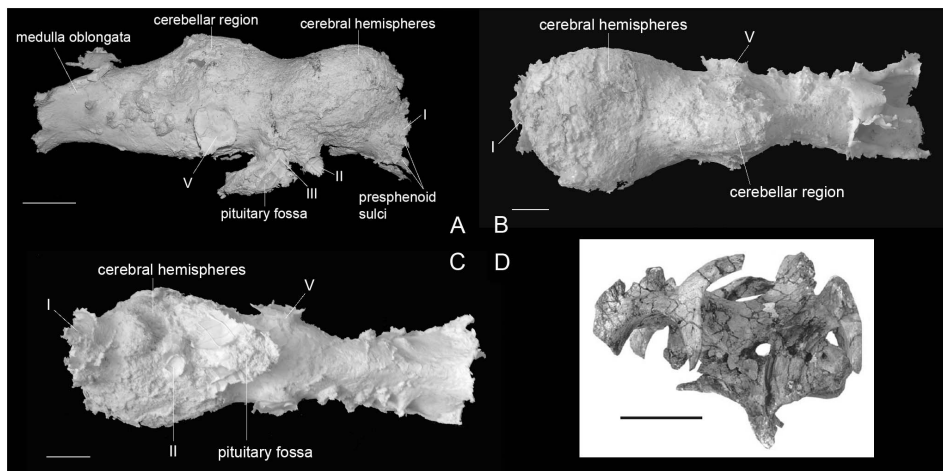

**Figure 1. Endocranial cast of *Amurosaurus riabinini* (IRSNB R 279).** (A) right lateral view, (B) dorsal view, (C) ventral view, (D) left lateral view of the braincase (AEHM 1/232) (after [2]). Roman numerals refer to cranial nerves. Scale bar equals 2 cm for (A), (B) and (C) and equals 10 cm for (D). doi:10.1371/journal.pone.0078899.g001

is reflected in the bones of the roof of the skull, the frontals having a domed appearance as it is usually observed in lambeosaurines [2]. As observed on AEHM 1/240, valleculeae are present on the rostral part of the endocast, on the cerebral hemispheres (Fig. 2). The brains of dinosaurs are generally thought to have been separated from the endocranial walls by the intercession of cerebrospinal fluid between the meninges and/or venous sinuses within the dura [8,13,19,20,25,34,35]. The presence of valleculeae on the endocranial surfaces of braincase bones is generally thought to indicate regions where the dural envelope was thin and that the endocranium closely reflects brain morphology in the regions where they occur [13,14,15,16]. Evans [17] presented data regarding the occurrence of complex endocranial vascular impressions in hadrosaurid and pachycephalosaurid ornithischians, leading to the conclusion that the brain may have been particularly closely associated with the endocranium in the anterior and ventral regions of the brain. Valleculeae have also been observed in the basal hadrosauroid *Batyrosaurus rozhdestvenskyi* [36], demonstrating that this condition was not restricted to derived lambeosaurines. The presence of the valleculeae indicates that in *Amurosaurus riabinini* at least the cerebral hemispheres were in close contact with the inner wall of the braincase, and that this part of the brain is clearly represented by the endocast. The cerebral hemispheres represent 30% of the total volume of the endocast.

The endocranial cavity is nearly straight due to the extreme reduction of the cranial and pontine flexures. With its straight endocranial cavity, *Amurosaurus riabinini* shares the derived condition observed in other hadrosaurids and in *Iguanodon bernissartensis* Boulenger 1881 [37,38]. According to Hopson [13] and Giffin [39], the most likely causes of variation in the angles of the primitive flexure pattern are absolute skull size and relative eye size. Larger genera and individuals tend to have less flexed brains than do smaller genera and individuals because of the negative allometry of the brain and eye size in reptiles [13]. In large animals such as *Amurosaurus riabinini* [40], the brain was therefore less constrained by space limitation.

The endocast considerably narrows caudal to the cerebral hemispheres. The midbrain and hindbrain are marked by a peak that is slightly lower than the cerebral hemispheres. The position of the inner ear is marked by a profound constriction behind these parts. The pituitary fossa lies posteroventral to the optic nerve. It is

24.9 mm wide and 290 mm long. As observed on the cast of AEHM 1/233, the internal carotid arteries enter the pituitary fossa posteriorly. On the endocasts of the basal ornithopods *Dryosaurus*, *Hypsilophodon*, and *Zephyrosaurus* [41], the pituitary body appears relatively smaller. By contrast, on hadrosaurid specimens [26,42,43], the pituitary body appears relatively large in comparison with the rest of the endocast. For example, Ostrom [43] assessed the pituitary body of *Kritosaurus* at 40 mm long and nearly 30 mm in height and width.

The cranial nerves (CN) are well represented on the specimens IRSNB R 281 (Fig. 3) and IRSNB R 280 (Fig. 4). The casts are roughly of the same size as IRSNB R 279 but are from incomplete braincases.

As noted above, the olfactory system is not completely preserved. The olfactory nerve (CN I) is short but large (281.5 mm wide) and lined by discrete presphenoid sulci (Fig. 1A). The number of sulci cannot be determined with precision. The position of the olfactory nerve is dorsofrontal to the cerebral hemispheres, resembling the condition observed in derived lambeosaurines, contrasting with the low position observed in hadrosaurines. It was not possible to make a cast of the olfactory bulbs. As noted by Evans et al. [26], the olfactory system of hadrosaurids was relatively smaller than in most other dinosaurs [13].

The optic nerve (CN II) exits the braincase via a large foramen in the parasphenoid caudoventrally to the cerebral hemispheres. A protrusion beneath the hemispheres represents the optic nerves that quickly diverge from each other. The width of each optic nerve is 7.5 mm. The oculomotor nerve (CN III) exits the oculomotor foramen together with the abducens nerve (CN VI) (contra Saveliev et al. [18]) caudal to the foramen for the optic nerve foramen and dorsal to the pituitary body. The foramen is formed by the parasphenoid and the laterosphenoid [2].

The trigeminal nerve (CN V) is located on the ventrolateral part of the high peak between the midbrain and the hindbrain. It extends laterally via a characteristically large, laterally expanding, funnel-shaped foramen. The large diameter of the external trigeminal foramen, 18 mm in IRSNB R 279 and in IRSNB R 280, suggests that it housed the trigeminal ganglion [43], from which the *ramus ophthalmicus* (CN V<sub>1</sub>) extends rostrally via an horizontal and rostral sulcus on the laterosphenoid, and the

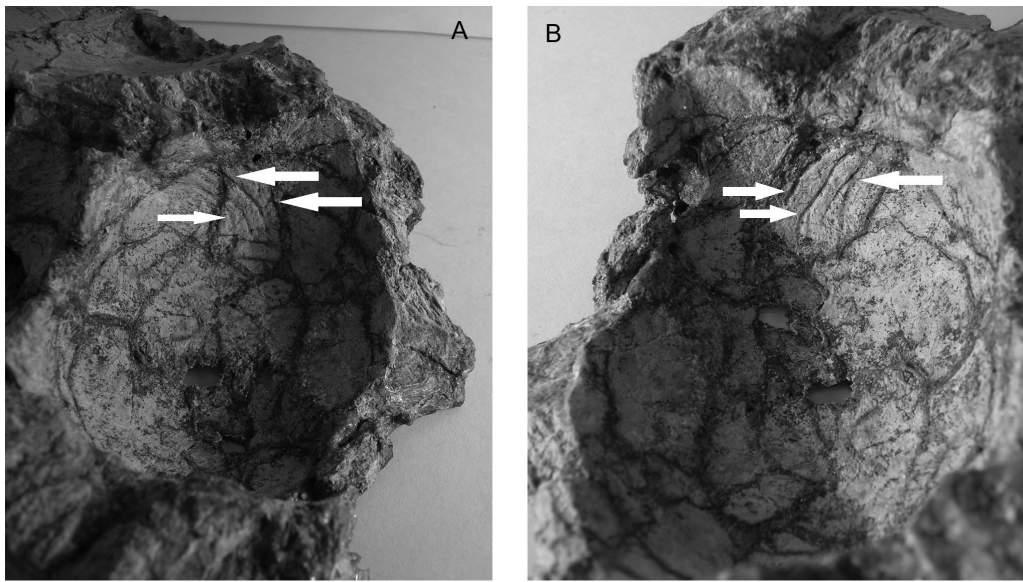

**Figure 2. Internal wall of a frontal of *Amurosaurus riabinini* (AEHM 1/240).** (A) left internal view, (B) right internal view. The specimen is 9.5 cm wide. Arrows point to some of the valliculae.  
doi:10.1371/journal.pone.0078899.g002

maxillary and mandibular branches (CN V<sub>2-3</sub>) extend ventrally at a right angle to the *ramus ophthalmicus*.

The abducens nerve (CN VI) exits the pituitary body caudally to enter the endocranial floor at the rostral end of the medulla, behind the foramen of the trigeminal nerve. The facial nerve (CN VII) exits the endocranial cavity through the prootic between the trigeminal foramen and *fenestra vestibulari*. It diverges before reaching the lateral wall into a dorsocaudal branch (*ramus hyomandibularis*) and the ventrorostral branch (*ramus palatinus*) (contra Saveliev et al. [18]).

We also disagree with the interpretation of Saveliev et al. [18] of the vestibulocochlear nerve (CN VIII) as being small and indicating poorly developed hearing in *Amurosaurus*. Semicircular canals could not be moulded and the interpretations about the movements and habits are speculative. Considering that the group typically possesses well-developed cranial crests devoted to oral communication, it would be highly unusual if a poor sense of hearing was present in lambeosaurine dinosaurs.

The glossopharyngeal nerve (CN IX) exits the braincase through the metotic foramen immediately caudal to the *fenestra*

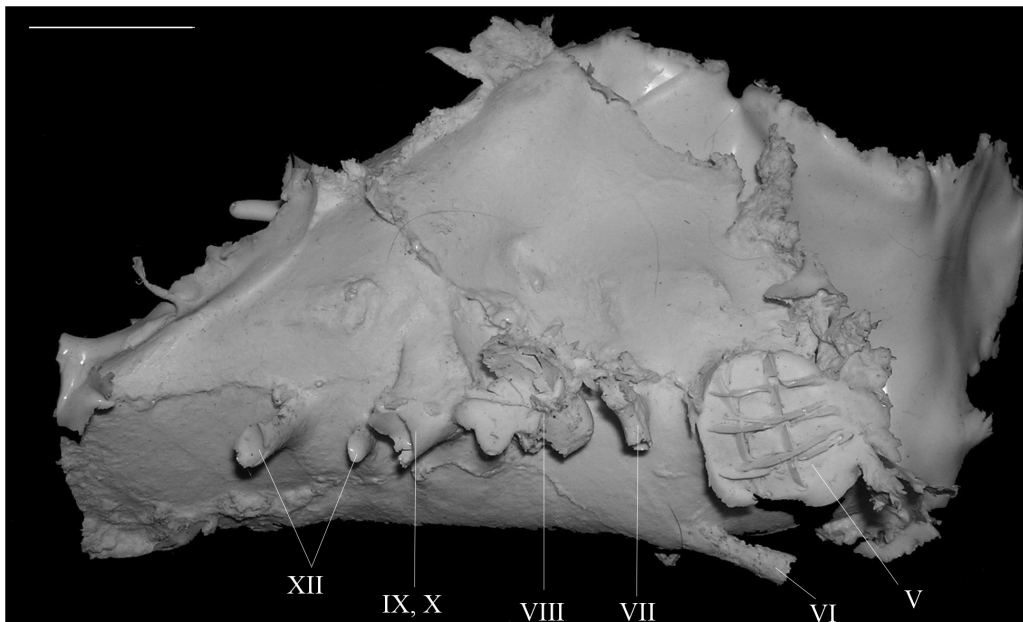

**Figure 3. Right lateral view of the endocranial cast of *Amurosaurus riabinini* (IRSNB R 281).** Roman numerals refer to cranial nerves. Scale bar equals 2 cm.  
doi:10.1371/journal.pone.0078899.g003

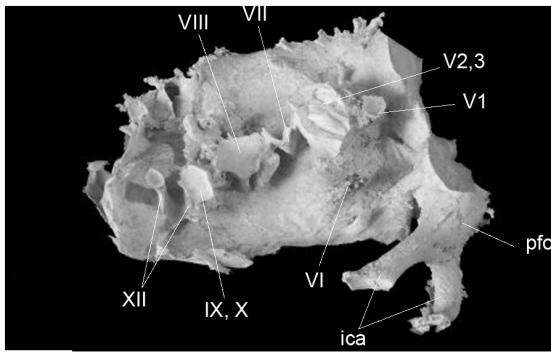

**Figure 4. Right lateral view of the endocranial cast of *Amurosaurus riabinini* (IRNSB R 280).** Abbreviations: *ica*, internal carotid arteries; *pfo*, pituitary fossa. Roman numerals refer to cranial nerves. Scale bar equals 2 cm.  
doi:10.1371/journal.pone.0078899.g004

*ovalis* [44]. The vagus nerve (CN X) exits immediately caudal to the glossopharyngeal nerve and is large and oval shaped. The accessory nerve (CN XI) is difficult to locate on the endocasts and its position has been discussed in the past. Ostrom [43] interpreted it as completely independent of the vagus nerve (CN X) on a *Kritosaurus* cast. Galton [41] and Evans et al. [26] considered that the accessory nerve may have exited the braincase along with the vagus (CN X) or the glossopharyngeal nerve (CN IX) through the metotic foramen. The hypoglossal nerve (CN XII) is represented by two branches. The caudal branch passes caudolaterally through the exoccipital near the occipital condyle. The rostral and smaller branch extends slightly ventrally of the medulla to a point immediately caudal to the vagus nerve (CN X). As expected in lambeosaurines [26,44], the most caudal foramen for the hypoglossal nerve is the largest.

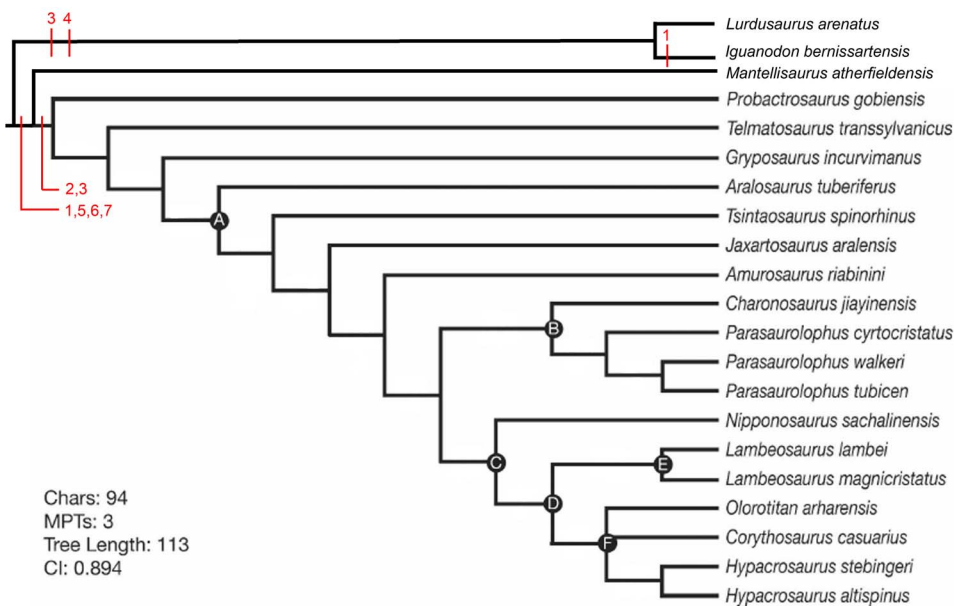

**Figure 5. Strict consensus of three most parsimonious trees recovered in phylogenetic analysis of Lambeosaurinae.** Strict consensus tree showing the phylogenetic relationships of *Amurosaurus riabinini* with other specimens discussed. Numbers correspond to endocranial characters: 1, width of olfactory peduncle; 2, volume of the pituitary gland; 3, absence of cranial and pontine flexures; 4, presence of the floccular fossa; 5, CRV; 6, REQ; 7, maximal width cerebral hemispheres/total length brain (modified from [76]).  
doi:10.1371/journal.pone.0078899.g005

## Encephalization Quotient

With a circumference of 400 mm (AEHM 1/1002; length = 1120 mm), and using the hypothesis that hadrosaurids were at least occasionally bipeds, we estimated the mass of an adult *Amurosaurus* using the formula of Anderson et al. [45] at 2.03 tons. REQ was based on the assumption that the brain of *Amurosaurus* filled approximately 60% of the endocranial cavity. Consequently the estimate of the REQ is 3.8.

Because hadrosaurids are generally thought to be facultatively bipedal rather than true bipeds [46,47], the estimation for a quadrupedal stance was also calculated, using a large humerus (AEHM 1/997; circumference = 267 mm) and the femur AEHM 1/1002 and the new formula established by Campione and Evans [23]. The mass estimation is 4.79 tons for an adult *Amurosaurus*. In this case, the REQ is 2.3.

## Discussion

The REQ (2.3–3.8) estimated for *Amurosaurus* is higher than most extant non-avian reptiles [14], as well as sauropod (*Diplodocus*, 0.53–0.69; *Nigersaurus*, 0.4–0.8; [48,49]) and ceratopsian (*Psittacosaurus*, 1.7; *Triceratops*, 0.7; [49,50]) dinosaurs. The REQ overlaps those of non-hadrosaurid iguanodontians (*Iguanodon bernissartensis*, 1.88–3.14; *Mantellisaurus atherfieldensis*, 1.68–2.67; [38]) and is similar to those calculated for hadrosaurine hadrosaurids (2.8; [26]) and for the lambeosaurine hadrosaurid *Hypacrosaurus altispinus* (2.3–3.7; [26]). Estimated REQ value for *Amurosaurus* also appear lower than most non-avian theropods (*Ceratosaurus*, 3.31–5.07; *Allosaurus*, 2.4–5.24; *Acrocanthosaurus*, 2.75–5.92; *Citipati* 3.6; *Tyrannosaurus*, 5.44–7.63; *Troodon*, 7.76; [48]).

Edinger [51,52] detailed evidence that the gigantism observed in many fossil species might be correlated to hyperpituitarism. Hyperpituitarism is a well-known condition with several manifestations such as acromegaly and diverse pathologies [53,54,55,56,57]. It is possible that the great sizes and heavy body masses of some dinosaurs were tied to an enlargement of the

pituitary gland, which led to increased production of growth hormone. It seems that dinosaurs achieving large size, such as *Amurosaurus riabinini*, were also characterized by a large pituitary fossa. The pituitary gland of large sauropods [58,59,60] is indeed relatively large compared to the size of the brain. This hypothesis requires, however, further testing and quantification.

We disagree with the interpretation of Saveliev et al. [18] that *Amurosaurus* had small, slow-moving eyeballs. The optic lobes are not apparent on the endocranial cast, and are also not apparent on the casts of other lambeosaurines [26,33,44] and in extant crocodiles (personal observation). Crocodiles have excellent eyesight [61,62]. As previously noted, the brain of *Amurosaurus* was not constrained by space limitation. Connective tissues probably covered the optic lobes, preventing their appearance on the cast. As a result, it is not possible to assess the size of the optic lobes, but there is no reason to consider that *Amurosaurus* had peculiarly small eyes. The size of the orbits is in the same range as that observed in other hadrosaurids. The diversity of cranial crests exhibited by lambeosaurines and the presence of sexual dimorphism [63,64] would favor the hypothesis of animals using visual cues as means of communication. This hypothesis has been often discussed and is currently widely accepted [13,33,47,64]. Saveliev et al. [18] hypothesized that the vomeronasal system played a role in the reproduction of hadrosaurids, even though this organ is absent in all extant archosaurs. The presence of the vomeronasal system in *Amurosaurus* is thus ruled out [65]. *Amurosaurus* was a strict and specialized herbivore [47,66] that lived in a savannah-like environment with oasis vegetation along the banks of lakes and rivers, under a warm-temperate and relatively arid climate [2].

The cerebral hemispheres of *Amurosaurus riabinini* were slightly flattened and relatively smaller than those in more derived North American lambeosaurines [26]. The shape and the relative size of the cerebral hemispheres reflect the phylogenetic position of *Amurosaurus riabinini* as a basal member of the Lambeosaurinae ([2,7,44], contra [67]).

According to Evans et al. [26], the most striking aspect of the brain endocast of lambeosaurine hadrosaurids is the relatively large size of the cerebrum. The estimated relative volume of the cerebrum (CRV = cerebrum volume/endocast volume) in four late Campanian lambeosaurines from North America varies between 35 and 42% [26]. The cerebrum of lambeosaurines is therefore larger than that of large theropods such as *Carcharodontosaurus* (24%) and *Tyrannosaurus rex* (33%), but compares favorably with the

maniraptoran theropod *Conchoraptor* (43%) and even with the basal bird *Archaeopteryx* (45%). With a CRV of 30%, *Amurosaurus* is slightly under the estimated values for North American lambeosaurines but above those for the non-hadrosaurid iguanodontians *Iguanodon bernissartensis* (19%) [38] and *Lurdusaurus arenatus* Taquet and Russell, 1999 [68] (19%, [38]).

The presence of an enlarged brain and cerebrum relative to body size is usually equated with increased behavioral complexity in vertebrates [14,19,20,25]. Individuals living in groups are subjected to social interactions that require rapid and elaborate feedback to maintain the social hierarchy and the reproductive fitness of the individual among his group [69,70,71,72]. Dunbar [73] hypothesized that brain size can be a reliable estimator of group size because of the potential close relationship between neocortex size, brain cognitive capacity and individual recognition. The relatively large size of the brain and the cerebrum in lambeosaurines is consistent with the range and complexity of social behaviors inferred from the hypothesis that the supracranial crest was an intraspecific signaling structure for visual and vocal communication [26,74]. However, a similar increase in the relative size of the cerebellum can be observed in *Mantellisaurus atherfieldensis* (Hooley, 1925) [75] and in more basal Iguanodontia. The mix of ancestral and more derived characters exhibited by *Amurosaurus riabinini* is interpreted here as a reflection of its intermediate position in the phylogeny of the Lambeosaurinae (Fig. 5).

## Acknowledgments

This study was realized through the execution of S&T bilateral cooperation agreements on behalf of the Belgian State, Federal Scientific Policy. It constitutes part of a Ph.D. thesis by PL at the Université Libre de Bruxelles, under the direction of Martine Vercauteren and Pascal Godefroit. PL thanks Eric Dewamme for his learning and help about endocast techniques. The authors express gratitude to Emmanuel Gilissen for his useful advices and all the Russian and Belgian participants of the 2006 fieldwork at Blagoveschensk. David Evans, Andrew McDonald, Richard Butler and anonymous reviewers are thanked for their comments and suggestions.

## Author Contributions

Analyzed the data: PL. Wrote the paper: PL. Discussion of the conclusions: MV YB PG.

## References

- Bolotsky YL, Kurzanov SK (1991) The hadrosaurids of the Amur Region [in Russian]. In: Glubinnoe Stroenie Tihookeanskogo Obranleniä. Blagoveschensk: Amur KNII. 94–103.
- Godefroit P, Bolotsky YL, Van Isterbeek J (2004) The lambeosaurine dinosaur *Amurosaurus riabinini*, from the Maastrichtian of Far Eastern Russia. *Acta Palaeontologica Polonica* 49(4): 585–618.
- Bolotsky YL, Godefroit P (2004) A new hadrosaurine dinosaur from the Late Cretaceous of Far Eastern Russia. *Journal of Vertebrate Paleontology* 24(2): 354–368.
- Godefroit P, Bolotsky YL, Alifanov V (2003) A remarkable hollow-crested hadrosaur from Russia: an Asian origin for lambeosaurines. *Comptes Rendus Palevol* 2(2): 143–151.
- Godefroit P, Zan S, Jin L (2000) *Charonosaurus jiyinensis* n.g., n.sp., a lambeosaurine dinosaur from the Late Maastrichtian of north-eastern China. *Comptes rendus de l'Académie des Sciences de Paris, Sciences de la Terre et des planètes* 330(12): 875–882.
- Godefroit P, Zan S, Jin L (2001) The Maastrichtian (Late Cretaceous) lambeosaurine dinosaur *Charonosaurus jiyinensis* from north-eastern China. *Bulletin de l'Institut royal des Sciences naturelles de Belgique, Sciences de la Terre* 71: 119–168.
- Godefroit P, Shulin H, Tinghai Y, Lauters P (2008) New hadrosaurid dinosaurs from the uppermost Cretaceous of northeastern China. *Acta Palaeontologica Polonica* 53(1): 47–74.
- Rogers SW (1999) *Allosaurus*, crocodiles, and birds: evolutionary clues from spiral computed tomography of an endocast. *The Anatomical Record* 257(5): 162–173.
- Serrano-Brañas CI, Hernández-Rivera R, Torres-Rodríguez E, Chávez BE (2006) A natural hadrosaurid endocast from the Cerro Del Pueblo Formation (Upper Cretaceous) of Coahuila, Mexico. In: Lucas SG, Sullivan RM, editors. *Late Cretaceous vertebrates from the Western Interior*. New Mexico Museum of Natural History and Science Bulletin 35. pp. 317–321.
- Dechaseaux C (1962) *Cerveaux d'animaux disparus*. Essai de paléoneurologie. Paris: Masson et C<sup>ie</sup>. 152 p.
- Chatterjee S, Zheng Z (2002) Cranial anatomy of *Shunosaurus*, a basal sauropod dinosaur from the Middle Jurassic of China. *Zoological Journal of the Linnean Society* 136(1): 145–169.
- Chatterjee S, Zheng Z (2005) Neuroanatomy and dentition of *Camarasaurus lentus*. In: Tidwell V, Carpenter K, editors. *Thunder-lizards*. The sauropodomorph dinosaurs. Bloomington: Indiana University Press. pp. 199–211.
- Hopson JA (1979) Paleoneurology. In: Gans C, Northcutt RC, Ulinski P, editors. *Biology of the Reptilia*, volume 9, Neurology A. New York: Academic Press. pp. 39–146.
- Hurlburt GR (1996) Relative brain size in recent and fossil amniotes: determination and interpretation. Ph.D. dissertation, University of Toronto, Toronto, Canada. 250 p.
- Jerison HJ, Horner JR, Horner C (2001) Dinosaur forebrains. *Journal of Vertebrate Paleontology* 21(supplement to No.3): 65A.

16. Osmólska H (2004) Evidence on relation of brain to endocranial cavity in oviraptorid dinosaurs. *Acta Palaeontologica Polonica* 49(2): 321–324.
17. Evans DC (2005) New evidence on brain-endocranial cavity relationships in ornithischian dinosaurs. *Acta Palaeontologica Polonica* 50(3): 617–622.
18. Savleliev SV, Alifanov VR, Bolotsky YL (2012) Brain anatomy of *Amurosaurus riabinini* and some neurobiological peculiarities of duck-billed dinosaurs. *Paleontological journal* 46(1): 79–91.
19. Jerison HJ (1969) Brain evolution and dinosaur brains. *American Naturalist* 103(934): 575–588.
20. Jerison HJ (1973) Evolution of the brain and intelligence. New York: Academic Press. 482 p.
21. Stephan H (1960) Metodische Studien über den quantitativen Vergleich architektonischer Struktureinheiten des Gehirns. *Zeitschrift für Wissenschaftliche Zoologie* 164: 143–172.
22. Lauters P, Bolotsky YL, Van Itterbeeck J, Godefroit P (2008) Taphonomy and age profile of a Latest Cretaceous dinosaur bone bed in Far Eastern Russia. *Palaios* 23(3): 153–162.
23. Campione NE, Evans DC (2012) A universal scaling relationship between body mass and proximal limb bone dimensions in quadrupedal terrestrial tetrapods. *BMC Biology* 10: 60.
24. Kilbourne BM, Makovicky PJ (2010) Limb bone allometry during postnatal ontogeny in non-avian dinosaurs. *Journal of Anatomy* 217(2): 135–152.
25. Hopson JA (1977) Relative brain size and behavior in archosaurian reptiles. *Annual Review of Ecology and Systematics* 8: 429–448.
26. Evans DC, Ridgely R, Witmer LM (2009) Endocranial anatomy of lambeosaurine hadrosaurids (Dinosauria: Ornithischia): a sensorineural perspective on cranial crest function. *The Anatomical Record* 292(9): 1315–1337.
27. Owen R (1842) Report on British fossil reptiles. Part II. In: Report of the Eleventh Meeting of the British Association for the Advancement of Science, held at Plymouth, July 1841, London. pp. 66–204.
28. Seeley HG (1887) On the classification of the fossil animals commonly called Dinosauria. *Proceedings of Royal Society of London* 43(258–265): 165–171.
29. Marsh OC (1881) Classification of the Dinosauria. *American Journal of Science*, series 3 23: 81–86.
30. Sereno PC (1986) Phylogeny of the bird-hipped dinosaurs (Order Ornithischia). *National Geographic Research* 2(2): 234–256.
31. Cope ED (1869) Synopsis of the extinct Batrachia, Reptilia and Aves of North-America. *Transactions of the American Philosophical Society* 14: 1–252.
32. Parks WA (1923) *Corythosaurus intermedius*, a new species of trachodont dinosaur. University of Toronto Studies, Geological Series 15: 5–57.
33. Evans DC (2006) Nasal cavity homologies and cranial crest function in lambeosaurine dinosaurs. *Paleobiology* 32(1): 109–125.
34. Larsson HCE, Sereno PC, Wilson JA (2000) Forebrain enlargement among nonavian dinosaurs. *Journal of Vertebrate Paleontology* 20(3): 615–618.
35. Larsson HCE (2001) Endocranial anatomy of *Carcharodontosaurus saharicus* (Theropoda: Allosauridae) and its implications for theropod brain evolution. In: Tanke D, Carpenter K, editors. *Mesozoic Vertebrate Life: New Research Inspired by the Paleontology of Philip J. Currie*. Bloomington: Indiana University Press. pp. 19–33.
36. Godefroit P, Escuillié F, Bolotsky YL, Lauters P (2012) A new basal hadrosauroid dinosaur from the Late Cretaceous of Kazakhstan. In: Godefroit P, editor. *Bernissart Dinosaurs and Early Cretaceous Terrestrial Ecosystems*. Bloomington: Indiana University Press. pp. 353–376.
37. Boulenger GA (1881) Sur l'arc pelvien chez les dinosaures de Bernissart. *Bulletin de l'Académie royale de Belgique*, 3ème série 1(5): 1–11.
38. Lauters P, Coudyzer W, Vercauteren M, Godefroit P (2012) The brain of *Iguanodon* and *Mantellisaurus*: perspectives on ornithopod evolution. In: Godefroit P, editor. *Bernissart Dinosaurs and Early Cretaceous Terrestrial Ecosystems*. Bloomington: Indiana University Press. pp. 227–238.
39. Giffin EB (1989) Pachycephalosaur paleoneurology (Archosauria: Ornithischia). *Journal of Vertebrate Paleontology* 9(1): 67–77.
40. Godefroit P, Van Itterbeeck J, Lauters P, Bolotsky YL, Dong Z-M, et al. (2009) Latest Cretaceous hadrosaurid dinosaurs from Heilongjiang Province (P. R. China) and the Amur Region (Far Eastern Russia). In: Huerta Hurtado P, Torcida Fernández-Baldor F, editors. *Actas de las IV Jornadas Internacionales sobre Paleontología de Dinosaurios y su Entorno*. pp. 91–120.
41. Galton PM (1989) Crania and endocranial casts from ornithopod dinosaurs of the families Dryosauridae and Hypsilophodontidae (Reptilia: Ornithischia). *Geologica et Palaeontologica* 23: 217–239.
42. Lull RS, Wright NE (1942) Hadrosaurian Dinosaurs of North America. *Geological Society of America, special papers* 40: 1–242.
43. Ostrom JH (1961) Cranial morphology of the hadrosaurian dinosaurs of North America. *Bulletin of the American Museum of Natural History* 122(2): 33–186.
44. Evans DC (2010) Cranial anatomy and systematic of *Hypacrosaurus altispinus*, and a comparative analysis of the skull growth in lambeosaurine hadrosaurids (Dinosauria: Ornithischia). *Zoological Journal of the Linnean Society* 159(2): 398–434.
45. Anderson JF, Hall-Martin A, Russell DA (1985) Long-bone circumference and weight in mammals, birds and dinosaurs. *Journal of Zoology, London (A)* 207(1): 53–61.
46. Forster CA (1997) Hadrosauridae. In: Currie PJ, Padian K, editors. *Encyclopedia of dinosaurs*. New York: Academic Press. pp. 293–299.
47. Horner JR, Weishampel DB, Forster CA (2004) Hadrosauridae. In: Weishampel DB, Dodson P, Osmólska H, editors. *The Dinosauria* (second edition). Berkeley: University of California Press. pp. 438–463.
48. Franzosa JW (2004) Evolution of the brain in Theropoda (Dinosauria). Ph.D. dissertation, Department of Geological Sciences, University of Texas at Austin, Texas. 381 p.
49. Witmer LM, Ridgely RC, Dufeu DL, Semones MC (2008) Using CT to peer into the past: 3D visualization of the brain and ear regions of birds, crocodiles, and nonavian dinosaurs. In: Endo H, Frey R, editors. *Anatomical imaging: towards a new morphology*. Tokyo: Springer-Verlag. pp. 67–88.
50. Zhou C-F, Gao K-Q, Fox RC, Du X-K (2007) Endocranial morphology of psittacosaur (Dinosauria: Ceratopsia) based on CT scans of new fossils from the Lower Cretaceous, China. *Palaeoworld* 16(4): 285–293.
51. Edinger T (1942) The pituitary body in giant animals fossil and living: a survey and a suggestion. *The Quarterly Review of Biology* 17(1): 31–45.
52. Edinger T (1964) Recent Advances in Paleoneurology. *Progress in Brain Research* 6: 147–160.
53. Evans HM, Meyer KF, Simpson ME (1933) The growth- and gonad-stimulating hormones of the anterior hypophysis. *Memoirs of the University of California* 11: 1–446.
54. Lopus S, Rubenstein AH, Wright AD (1968) Measurements of Serum Growth Hormone and Insulin in Gigantism. *Journal of Clinical Endocrinology and Metabolism* 28(3): 393–398.
55. Gelber SJ, Heffez DS, Donohoue PA (1992) Pituitary gigantism caused by growth hormone excess from infancy. *The Journal of Pediatrics* 120(6): 931–934.
56. Zimmerman D Jr, Young WF, Ebersold MJ, Scheithauer BW, Kovacs K, et al. (1993) Congenital gigantism due to growth hormone-releasing hormone excess and pituitary hyperplasia with adenomatous transformation. *Journal of Clinical Endocrinology and Metabolism* 76(1): 216–222.
57. Ambler G (2002) Overgrowth. *Best Practice & Research Clinical Endocrinology & Metabolism* 16(3): 519–546.
58. Nopsca F (1917) Die Riesenformen unter den Dinosauriern. *Centralblatt für Mineralogie, Geologie, und Palaeontologie* 1917: 332–351.
59. Sander PM, Christian A, Claus M, Fechner R, Gee CT, et al. (2011) Biology of the sauropod dinosaurs: the evolution of gigantism. *Biological Reviews* 86(1): 117–155.
60. Sereno PC, Wilson JA, Witmer LM, Whitlock JA, Maga A, et al. (2007) Structural Extremes in a Cretaceous Dinosaur. *PLoS ONE* 2(11): e1230. doi: 10.1371/journal.pone.0001230.
61. Fleishman LJ, Howland HC, Howland MJ, Rand AS, Davenport ML (1988) Crocodiles don't focus underwater. *Journal of Comparative Physiology A* 163(4): 441–443.
62. Walker SM (2004) *Crocodiles*. Minneapolis: Lerner Publishing Group. 48 p.
63. Dodson P (1975) Taxonomic implications of relative growth in lambeosaurine dinosaurs. *Systematic Zoology* 24(1): 37–54.
64. Hopson JA (1975) The evolution of cranial display structures in hadrosaurian dinosaurs. *Paleobiology* 1(1): 21–43.
65. Senter P (2002) Lack of a pheromonal sense in phytosaurs and other archosaurs, and its implications for reproductive communication. *Paleobiology* 28(4): 544–550.
66. Erickson GM, Krick BA, Hamilton M, Bourne GR, Norell MA, et al. (2012) Complex dental structure and wear biomechanics in hadrosaurid dinosaurs. *Science* 338: 98–101.
67. Prieto-Márquez A (2010) Global phylogeny of Hadrosauridae (Dinosauria: Ornithischia) using parsimony and Bayesian methods. *Zoological Journal of the Linnean Society* 159(2): 435–502.
68. Taquet P, Russell DA (1999) A massively-constructed iguanodont from Gadoufaoua, Lower Cretaceous of Niger. *Annales de Paléontologie* 85(1): 85–96.
69. Dunbar RIM (1992) Neocortex size as a constraint on group-size in Primates. *Journal of Human Evolution* 22(6): 469–493.
70. Dunbar RIM, Bever J (1998) Neocortex Size Predicts Group Size in Carnivores and Some Insectivores. *Ethology* 104(8): 695–708.
71. Javier Pérez-Barbería F, Gordon IJ (2005) Gregariousness increases brain size in ungulates. *Oecologia* 145(1): 41–52.
72. Shultz S, Dunbar R (2010) Encephalization is not a universal macroevolutionary phenomenon in mammals but is associated with sociality. *Proceedings of the National Academy of Sciences of the United States of America* 107(50): 21582–21586.
73. Dunbar RIM (1998) The social brain hypothesis. *Evolutionary Anthropology* 6(5): 178–190.
74. Weishampel DB (1981) Acoustic analyses of potential vocalization in lambeosaurine dinosaurs (Reptilia: Ornithischia). *Paleobiology* 7(2): 252–261.
75. Hooley RW (1925) On the skeleton of *Iguanodon atherfieldensis* from the Wealden shales of Atherfield (Isle of Wight). *Quarterly Journal of the Geological Society of London* 81: 1–61.
76. Evans DC, Reisz RR (2007) Anatomy and relationships of *Lambeosaurus magnicristatus*, a crested hadrosaurid dinosaur (Ornithischia) from the Dinosaur Park Formation, Alberta. *Journal of Vertebrate Paleontology* 27(2): 373–393.
